# Supplementary material for: Why the bigger live longer and travel farther: animals, vehicles, rivers and the winds
Source: PubMed Central journal article supplement — Sci Rep. 2012 Aug 24;2:594. doi: 10.1038/srep00594 (PMC3426796; doi:10.1038/srep00594), 2012-08-24
Supplement: srep00594-s1.pdf [file srep00594-s1.pdf]

**Why the bigger live longer and travel farther:  
animals, vehicles, rivers and the winds**

**Prof. Adrian Bejan  
Duke University**

**Supplementary Document**

## Supplementary Information A

The scales of a two-dimensional turbulent jet are [12]

$$\bar{u}_c = U \left( \frac{x}{x_0} \right)^{-1/2} \quad (\text{A1})$$

$$\gamma \frac{D}{x_0} = \frac{4}{3} \quad (\text{A2})$$

where  $\gamma = 7.67$  is an empirical constant. In the limit  $x_0 \ll L$  ( or  $\varepsilon \ll 1$ ), the travel time from  $x = x_0$  to  $x = L$  along the jet axis is

$$t \sim 3.83 \frac{D}{\varepsilon^3 U} \quad (\text{A3})$$

The corresponding length of travel is

$$L \sim 5.75 \frac{D}{\varepsilon^2} \quad (\text{A4})$$

## Supplementary Information B

The turbulent plume [12] rising above a concentrated heat source  $q$ [W] has a centerline speed ( $\bar{v}_c$ ) that decreases with altitude ( $y$ ),

$$\bar{v}_c = \left( K \frac{q}{y} \right)^{1/3} \quad (\text{B1})$$

where  $K$  is a constant of order  $g\beta\alpha/k$ , where  $g$  is the gravitational acceleration,  $\beta$  is the coefficient of volumetric thermal expansion of the fluid,  $\alpha$  is the thermal diffusivity, and  $k$  is the thermal conductivity. If the length scale of the heat source is  $D$ , then  $q \sim q'''D^3$ , where  $q'''$  is the volumetric heat generation rate. The highest speed occurs in the vicinity of the source,  $\bar{v}_c(y = D)$ , and the lowest is at  $y = L$ , which marks the travel of the flow. As in Eq. (2), we define the plume travel as  $\bar{v}_c(y = L)/\bar{v}_c(y = D) \sim \varepsilon \ll 1$ , therefore

$$L \sim \frac{D}{\varepsilon^3} \quad (\text{B2})$$

The life time of the fluid packet is the integral of  $dt = dy/\bar{v}_c$ , from  $y = D$  to  $y = L$ ,

$$t \sim \frac{3D^{1/3}}{4\varepsilon^4(q''K)^{1/3}} \quad (\text{B3})$$

Equations (B2) and (B3) show that larger plumes (with larger  $D$ ) travel farther and have longer life spans.

### Supplementary Information C

The inefficiency of flow systems is due to finite sizes, which means finite flow resistances (fluid flow, heat transfer, mass transfer, etc.). Consider a power plant as a system (open or closed) in steady state. Inside the system there are components (e.g., heat exchangers) of surface area  $A$ , which have the function of transferring the heat current  $q$  from a hot fluid ( $T_H$ ) to a cold fluid ( $T_L$ ). In Fig. C1 the system is closed and executes cycles. The thermodynamic imperfection due to the surface  $A$  is measurable as the rate of entropy generation associated with the component [14]

$$\dot{S}_{\text{gen}} = \frac{q}{T_L} - \frac{q}{T_H} \cong \frac{q\Delta T}{T_L^2} \quad (\text{C1})$$

where  $\Delta T = T_H - T_L$ , and  $\Delta T \ll (T_H, T_L)$ . The heat current is proportional to the size of the surface [12]

$$q = h A \Delta T \quad (\text{C2})$$

where  $h$  is the overall convective heat transfer or mass transfer coefficient. Combining Eqs. (C1) and C2), and recognizing  $T_L \dot{S}_{\text{gen}}$  as the useful power destroyed because of the irreversibility of heat transfer components (see the Gouy Stodola theorem [16]), we obtain

$$T_L \dot{S}_{\text{gen}} \cong \frac{q^2}{T_L h A} \quad (\text{C3})$$

The power output of the plant is

$$\dot{W} = \dot{W}_{\text{rev}} - T_L \dot{S}_{\text{gen}} \quad (\text{C4})$$

where  $\dot{W}_{\text{rev}}$  is the power output in the limit of reversible operation. The second law efficiency of the power plant ( $\eta_{\text{II}}$ ) is a number between 0 and 1 [14, 16], which after combining Eqs. (C3) and (C4) becomes

$$\eta_{\text{II}} = \frac{\dot{W}}{\dot{W}_{\text{rev}}} = 1 - \frac{q^2}{T_L \dot{W}_{\text{rev}} h A} \quad (\text{C5})$$

Next, if we use  $A^{1/2}$  as an indicator of the length scale of the power plant of mass  $M$ , then  $A^{1/2}$  is proportional to  $M^{1/3}$ , and  $A$  scales as  $M^{2/3}$ . In conclusion, Eq. (C5) reduces to

$$\eta_{\text{II}} = 1 - C' M^{-k} \quad (\text{C6})$$

where  $C'$  is a constant and  $k = 2/3$ . Equation (C6) shows that  $\eta_{\text{II}}$  increases monotonically with the size of the power plant system. We express the same trend analytically if we approximate Eq. (C6) locally [at a point  $(\eta_{\text{II}}, M)$  on the curve] with a power-law expression

$$\eta_{\text{II}} = C'' M^\alpha \quad (\text{C7})$$

where  $C''$  is a constant, and  $\eta = \eta_{\text{II}} \eta_C$ , where  $\eta_C$  is the Carnot efficiency of the power plant. Note that Eq. (C7) is the same as Eq. (22), where  $C_1 \eta_C = C''$ . If we require that Eqs. (C6) and (C7) match in value ( $\eta_{\text{II}}$ ) and slope ( $d\eta_{\text{II}} / dM$ ) at the point  $(\eta_{\text{II}}, M)$ , then

$$\frac{k}{\alpha} = \frac{1 - \eta_{\text{II}}}{\eta_{\text{II}}} \quad (\text{C8})$$

The  $\eta_{\text{II}}$  data for the efficiency of modern power generation technology show that  $\eta_{\text{II}} \ll 1$  [14,

16]. This means that  $\alpha$  is comparable with  $k$  but smaller than  $k$ , approximately  $\alpha \cong \eta_{\Pi} k$ . Note that the factors  $C'$  and  $C''$  do not appear in Eq. (C8).

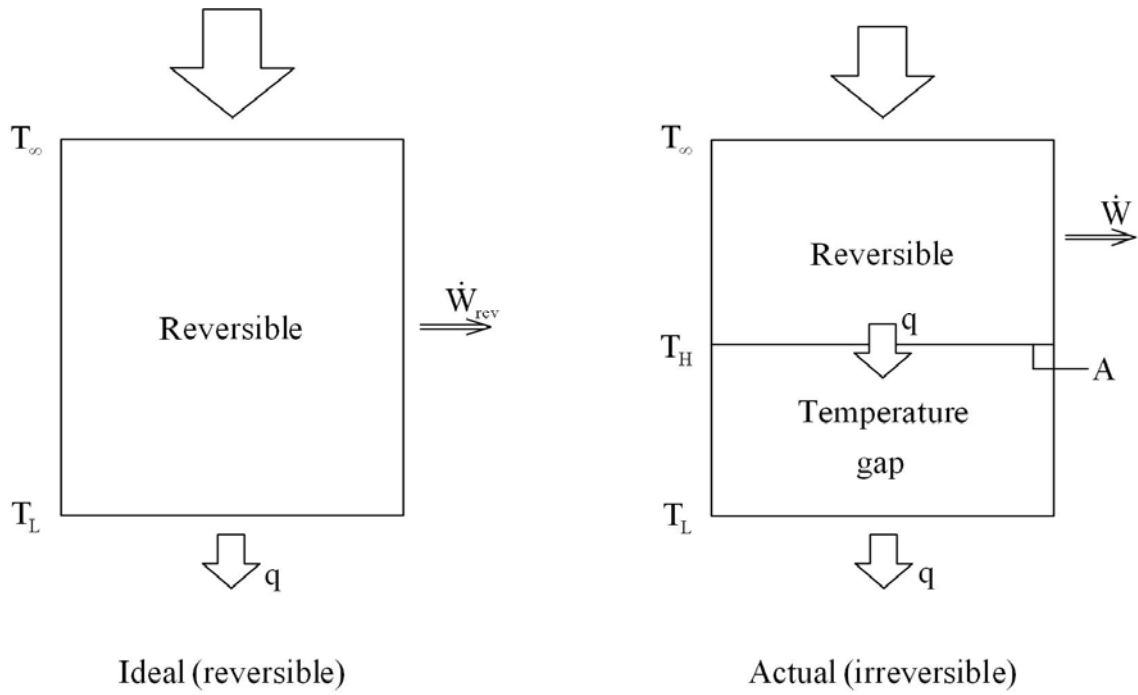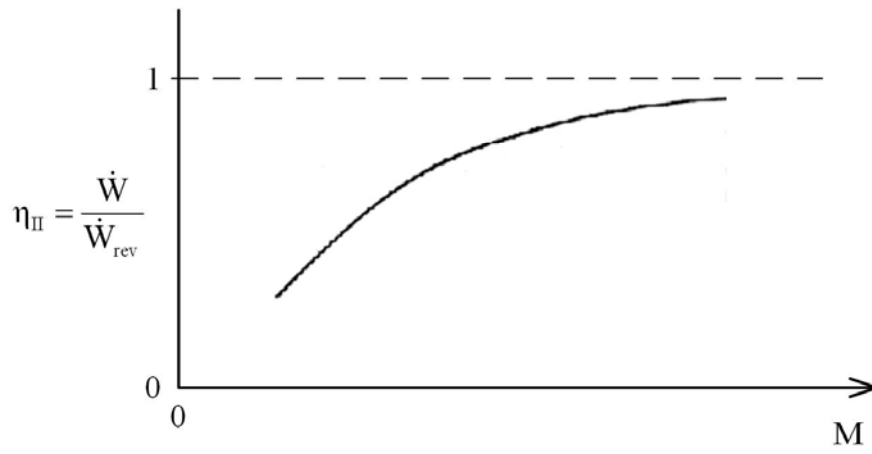

Figure C1
